# Supplementary material for: Coordination-assembled myricetin nanoarchitectonics for sustainably scavenging free radicals
Source: publisher site journal article supplement (doi:10.3762/bjnano.13.23), 2022-03-01
Supplement: Additional file 1 [file 2190-4286-13-23-S1.pdf]

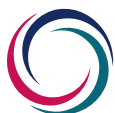

## Supporting Information

for

### **Coordination-assembled myricetin nanoarchitectonics for sustainably scavenging free radicals**

Xiaoyan Ma, Haoning Gong, Kenji Ogino, Xuehai Yan and Ruirui Xing

*Beilstein J. Nanotechnol.* **2022**, *13*, 284–291. [doi:10.3762/bjnano.13.23](https://doi.org/10.3762/bjnano.13.23)

## Additional experimental data

## Materials and Instruments

**Materials:** Myricetin (95%) was bought from Thermo Fisher Scientific. L-Glutathione (reduced) was obtained from Solarbio. Zinc(II) chloride ( $\text{ZnCl}_2$ ) (98%) was purchased from Beijing Chemical Works. 2,2'-Azinobis-(3-ethylbenzthiazoline-6-sulfonate) was bought from Innochem (Beijing). 2',7'-Dichlorodihydrofluorescein diacetate was bought from MedChemexpress. Dulbecco's Modified Eagle medium, fetal bovine serum (FBS), penicillin/streptomycin, and trypsin-EDTA were bought from BioLegend.

**Instruments:** TEM images of nanoparticles were exhibited by a model JEM-1011 transmission scanning electron microscope (JEM-1011, JEOL, Japan). The size distribution and zeta potential of nanoparticles were measured by a Malvern DLS instrument (Zetasizer Nano ZS ZEN3600). UV/vis absorption spectra were tested by a Shimadzu UV-2600 spectrophotometer. FTIR spectra were obtained by a TENSOR 27 FTIR spectrometer (BRUKER). The cell viability was evaluated using MTT assay, in which the absorbance was measured by a microplate reader (Multiskan FC, Thermo Fisher Scientific). Confocal laser scanning microscopy (CLSM) images of cells were captured by CLSM (Olympus FV1000). Inductively coupled plasma-optical emission spectroscopy (ICP-OES, Prodigy, Leeman, USA) was used for evaluating concentration of  $\text{Zn}^{2+}$  in quantitative component analysis of MZG.

**Table S1:** Component analysis of MZG NPs.

| Component                      | Myr | GSH | Zn <sup>2+</sup> |
|--------------------------------|-----|-----|------------------|
| Feeding concentration<br>(mM)  | 3   | 6   | 1.57             |
| Measured concentration<br>(mM) | 1.5 | 1.5 | 1.3              |

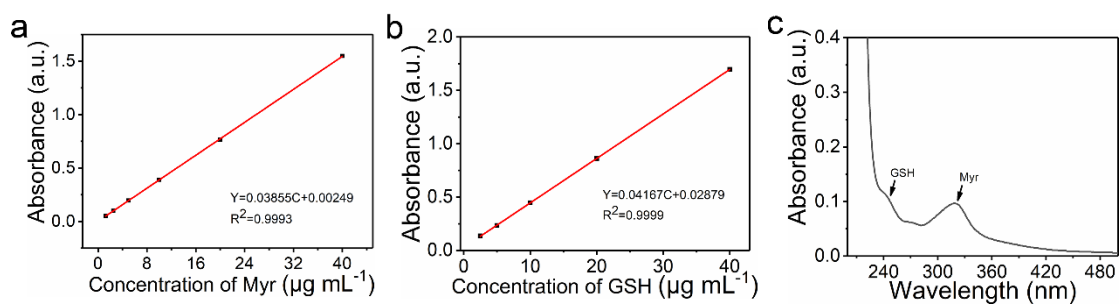

**Figure S1:** (a) The standard curve of Myr in 0.1 M NaOH. (b) The standard curve of GSH in 0.1 M NaOH. GSH dissolved in 0.1 M NaOH has an UV-vis absorption peak at ca. 240 nm. (c) The UV-vis absorption spectrum of diluted MZG nanoparticles (2000-fold) in 0.1 M NaOH.

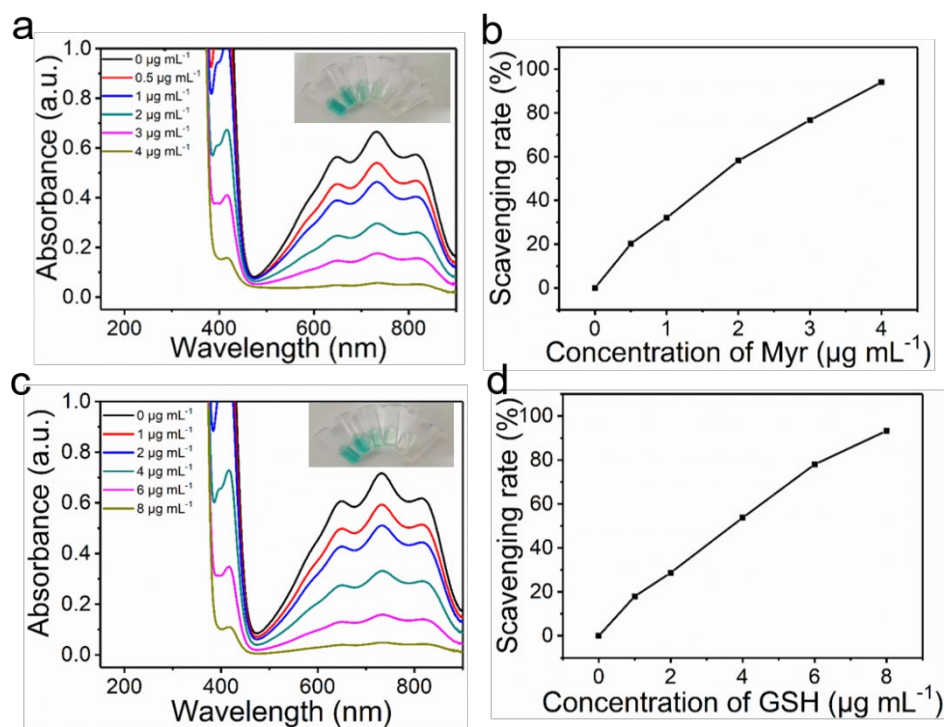

**Figure S2:** (a) UV-vis absorption spectra of ABTS solution incubated with different concentrations of Myr. A sample picture is shown in the inset. (b) Scavenging rate of Myr. (c) UV-vis absorption spectra of ABTS solution incubated with different concentrations of GSH. The inset shows a sample picture. (d) Scavenging rate of GSH.
